# Supplementary material for: Liquid–liquid phase separation in particles containing organics mixed with ammonium sulfate, ammonium bisulfate, ammonium nitrate or sodium chloride
Source: Copernicus journal article supplement (doi:10.5194/acp-13-11723-2013), 2013-12-03
Supplement: Supplementary file 1 [file acp-13-11723-2013-supplement.zip]

## Supplementary Information

**Title: liquid-liquid phase separation in particles containing organics mixed with ammonium sulfate, ammonium bisulfate, ammonium nitrate or sodium chloride**

Yuan You, Lindsay Renbaum-Wolff, and Allan K. Bertram<sup>1</sup>

Department of Chemistry, University of British Columbia, 2036 Main Mall, Vancouver, BC, V6T 1Z1, Canada

<sup>1</sup>To whom correspondence should be addressed:

Email: bertram@chem.ubc.ca

### Supporting Movies

**Movie S1.** A movie of a particle (OIR = 2.0 and diameter = 28.0  $\mu\text{m}$ ) consisting of 2-methylglutaric acid and ammonium sulfate. Images were recorded as the RH was decreased from 79% to 72% at a temperature of  $290 \pm 1$  K. The ramp rate was approximately 0.6% RH  $\text{min}^{-1}$ . For the particle shown in this movie, liquid-liquid phase separation occurred at an RH  $75 \pm 2.5\%$ . A rough indication of the RH during the movie has been included.

**Movie S2.** A movie of a particle (OIR = 2.0 and diameter = 32.3  $\mu\text{m}$ ) consisting of 2-methylglutaric acid and ammonium bisulfate. Images were recorded as the RH was decreased from 70% to 60% at a temperature of  $290 \pm 1$  K. The ramp rate was approximately 0.6% RH  $\text{min}^{-1}$ . For the particle shown in this movie, liquid-liquid phase separation occurred at an RH  $65.5 \pm 2.5\%$ . A rough indication of the RH during the movie has been included.

**Movie S3.** A movie of a particle (OIR = 2.1 and diameter = 33.6  $\mu\text{m}$ ) consisting of 2-methylglutaric acid and sodium chloride. Images were recorded as the RH was decreased from 65% to 55% at a temperature of  $290 \pm 1$  K. The ramp rate was approximately 0.6% RH  $\text{min}^{-1}$ . For the particle shown in this movie, liquid-liquid phase separation occurred at an RH  $60.2 \pm 2.5\%$ . A rough indication of the RH during the movie has been included.

**Movie S4.** A movie of a particle (OIR = 2.0 and diameter = 32.3  $\mu\text{m}$ ) consisting of 2-methylglutaric acid and ammonium nitrate. Images were recorded as the RH was decreased

from 43% to 27% at a temperature of  $290 \pm 1$  K. The ramp rate was approximately  $0.6\%$  RH  $\text{min}^{-1}$ . For the particle shown in this movie, liquid-liquid phase separation occurred at an RH  $35.3 \pm 2.5\%$ . A rough indication of the RH during the movie has been included.
